# Supplementary material
Source: PubMed Central journal article supplement (PMC5159526)
Supplement: supp_gkw671_nar-01232-z-2016-File008.pdf [file supp_gkw671_nar-01232-z-2016-File008.pdf]

| A                        |     | $\Delta G$ vs acc |                  | Controlling size |                 | Controlling GC |                  | controlling GC, size |                 | Controlling AA-content |                 | Controlling AA groups |                  | Controlling codon bias |                 |
|--------------------------|-----|-------------------|------------------|------------------|-----------------|----------------|------------------|----------------------|-----------------|------------------------|-----------------|-----------------------|------------------|------------------------|-----------------|
|                          |     | species           |                  | SP               |                 | SP             |                  | SP                   |                 | SP                     |                 | SP                    |                  | SP                     |                 |
| $\Delta G_{\text{mean}}$ | HSA | 0.28              | <b>6.3E-11</b>   | 0.13             | <b>2.54E-03</b> | 0.41           | <b>&lt;1E-16</b> | 0.11                 | <b>1.37E-02</b> | 0.09                   | <b>4.30E-02</b> | 0.11                  | <b>9.77E-03</b>  | 0.23                   | <b>8.03E-07</b> |
|                          | SCE | 0.15              | <b>4.1E-02</b>   | 0.03             | 6.68E-01        | 0.34           | <b>1.01E-06</b>  | 0.11                 | 1.33E-01        | 0.07                   | 3.89E-01        | 0.10                  | 2.03E-01         | 0.12                   | 1.96E-01        |
|                          | BSU | 0.54              | <b>&lt;1E-16</b> | 0.18             | <b>3.21E-02</b> | 0.42           | <b>4.96E-08</b>  | 0.09                 | 3.06E-01        | 0.42                   | <b>5.67E-07</b> | 0.40                  | <b>4.61E-07</b>  | 0.33                   | <b>1.84E-03</b> |
|                          | ECO | 0.43              | <b>&lt;1E-16</b> | 0.09             | <b>7.39E-02</b> | 0.26           | <b>6.09E-08</b>  | -0.02                | 6.26E-01        | 0.29                   | <b>1.95E-09</b> | 0.36                  | <b>1.53E-14</b>  | 0.03                   | 5.58E-01        |
| $\Delta G_{\text{min}}$  | TGA | 0.41              | <b>3.0E-05</b>   | 0.11             | 2.83E-01        | 0.41           | <b>1.56E-05</b>  | 0.11                 | 2.79E-01        | 0.37                   | <b>6.84E-04</b> | 0.32                  | <b>1.19E-03</b>  | 0.46                   | <b>2.38E-03</b> |
|                          | HSA | 0.38              | <b>&lt;1E-16</b> | 0.05             | 2.18E-01        | 0.39           | <b>&lt;1E-16</b> | -0.03                | 4.89E-01        | 0.22                   | <b>5.98E-07</b> | 0.26                  | <b>2.23E-09</b>  | 0.22                   | <b>1.61E-06</b> |
|                          | SCE | 0.49              | <b>3.0E-12</b>   | 0.13             | 7.45E-02        | 0.57           | <b>&lt;1E-16</b> | 0.19                 | <b>1.09E-02</b> | 0.27                   | <b>4.10E-04</b> | 0.35                  | <b>1.06E-06</b>  | 0.14                   | 1.10E-01        |
|                          | BSU | 0.60              | <b>2.9E-15</b>   | 0.20             | <b>1.45E-02</b> | 0.51           | <b>3.99E-12</b>  | 0.14                 | 1.09E-01        | 0.41                   | <b>9.34E-07</b> | 0.44                  | <b>1.54E-08</b>  | 0.30                   | <b>6.02E-03</b> |
| $\Delta G_{\text{max}}$  | ECO | 0.53              | <b>&lt;1E-16</b> | 0.09             | 6.69E-02        | 0.43           | <b>&lt;1E-16</b> | 0.03                 | 5.76E-01        | 0.36                   | <b>8.73E-14</b> | 0.43                  | <b>&lt;1E-16</b> | 0.19                   | <b>3.79E-04</b> |
|                          | TGA | 0.38              | <b>1.3E-04</b>   | -                | 9.15E-01        | 0.36           | <b>1.62E-04</b>  | -0.02                | 8.74E-01        | 0.27                   | <b>1.65E-02</b> | 0.34                  | <b>5.90E-04</b>  | -                      | 9.65E-01        |
|                          | HSA | -0.08             | 5.6E-02          |                  |                 |                |                  |                      |                 |                        |                 |                       |                  |                        |                 |
|                          | SCE | -0.32             | <b>8.0E-06</b>   |                  |                 |                |                  |                      |                 |                        |                 |                       |                  |                        |                 |
| $\Delta G_{\text{max}}$  | BSU | -0.05             | 5.8E-01          |                  |                 |                |                  |                      |                 |                        |                 |                       |                  |                        |                 |
|                          | ECO | -0.18             | <b>3.2E-04</b>   |                  |                 |                |                  |                      |                 |                        |                 |                       |                  |                        |                 |
|                          | TGA | -0.21             | <b>4.0E-02</b>   |                  |                 |                |                  |                      |                 |                        |                 |                       |                  |                        |                 |
|                          |     |                   |                  |                  |                 |                |                  |                      |                 |                        |                 |                       |                  |                        |                 |

| B        |     | $\Delta G_{\text{min}}$ vs acc |                  |     |
|----------|-----|--------------------------------|------------------|-----|
|          |     | SP                             | n                |     |
| Fold     | HSA | 0.44                           | <b>4.69E-10</b>  | 187 |
|          | SCE | 0.42                           | <b>7.83E-05</b>  | 84  |
|          | BSU | 0.63                           | <b>9.91E-11</b>  | 84  |
|          | ECO | 0.56                           | <b>3.14E-18</b>  | 204 |
|          | TGA | 0.36                           | <b>6.06E-03</b>  | 56  |
| Superfam | HSA | 0.42                           | <b>1.90E-10</b>  | 207 |
|          | SCE | 0.43                           | <b>2.43E-05</b>  | 90  |
|          | BSU | 0.60                           | <b>2.48E-10</b>  | 91  |
|          | ECO | 0.56                           | <b>&lt;1E-16</b> | 226 |
|          | TGA | 0.39                           | <b>1.83E-03</b>  | 60  |

| C   |     | ACC vs GC |                 |
|-----|-----|-----------|-----------------|
|     |     | SP        |                 |
| HSA |     | -0.13     | <b>2.41E-03</b> |
|     | SCE | 0.16      | <b>2.96E-02</b> |
| BSU |     | -0.37     | <b>4.88E-06</b> |
|     | ECO | -0.35     | <b>1.99E-13</b> |
| TGA |     | -0.13     | <b>2.18E-01</b> |

**Supplementary Table 1:** A, Correlations between mRNA folding energy (using  $\Delta G_{\text{mean}}$ ,  $\Delta G_{\text{min}}$  and  $\Delta G_{\text{max}}$  – rows from top to bottom, see **Methods**) and protein solvent accessibility (ACC) controlling protein size (size) and messenger GC content (GC), amino acids content (AA) and the fractions of 6 groups of amino acids (see Methods) (AA-group). Column 4 shows the partial correlation controlling both GC content and protein size. B, correlation between  $\Delta G_{\text{min}}$  and ACC after removing SCOP Fold or SCOP Superfamily (Superfam) redundancy and number of protein (n). C, Correlation between ACC and GC. Correlation and partial correlation is computed using Spearman's rank correlation (SP). Significance is indicated by pvalue inferior to 0.05 and is displayed in bold. HSA, SCE, BSU, ECO, TGA correspond respectively to *H. sapiens*, *S. cerevisiae*, *B. subtilis*, *E. coli* and *T. gammatolerans*. As protein solvent accessibility requires protein structures, we used here the structural dataset.

|                          |     | $\Delta G$ vs GC |                  | Controlling size |                  | $\Delta G$ vs size |                  | Controlling GC |                  | GC vs size |                  |
|--------------------------|-----|------------------|------------------|------------------|------------------|--------------------|------------------|----------------|------------------|------------|------------------|
| species                  |     | SP               |                  | SP               |                  | SP                 |                  | SP             |                  | SP         |                  |
| $\Delta G_{\text{mean}}$ | CEL | -0.69            | <b>&lt;1E-16</b> | -0.75            | <b>&lt;1E-16</b> | -0.19              | <b>&lt;1E-16</b> | -0.42          | <b>&lt;1E-16</b> | -0.15      | <b>&lt;1E-16</b> |
|                          | HSA | -0.92            | <b>&lt;1E-16</b> | -0.94            | <b>&lt;1E-16</b> | -0.18              | <b>&lt;1E-16</b> | -0.44          | <b>&lt;1E-16</b> | 0.01       | 5.43E-01         |
|                          | DME | -0.76            | <b>&lt;1E-16</b> | -0.79            | <b>&lt;1E-16</b> | -0.13              | <b>&lt;1E-16</b> | -0.38          | <b>&lt;1E-16</b> | -0.15      | <b>&lt;1E-16</b> |
|                          | SCE | -0.61            | <b>&lt;1E-16</b> | -0.66            | <b>&lt;1E-16</b> | -0.09              | <b>1.46E-09</b>  | -0.34          | <b>&lt;1E-16</b> | -0.27      | <b>&lt;1E-16</b> |
|                          | ASP | -0.59            | <b>&lt;1E-16</b> | -0.61            | <b>&lt;1E-16</b> | -0.17              | <b>&lt;1E-16</b> | -0.25          | <b>&lt;1E-16</b> | -0.06      | <b>6.55E-09</b>  |
|                          | NEU | -0.59            | <b>&lt;1E-16</b> | -0.62            | <b>&lt;1E-16</b> | -0.16              | <b>&lt;1E-16</b> | -0.30          | <b>&lt;1E-16</b> | -0.13      | <b>&lt;1E-16</b> |
|                          | BSU | -0.79            | <b>&lt;1E-16</b> | -0.76            | <b>&lt;1E-16</b> | -0.53              | <b>&lt;1E-16</b> | -0.42          | <b>&lt;1E-16</b> | 0.36       | <b>&lt;1E-16</b> |
|                          | MET | -0.72            | <b>&lt;1E-16</b> | -0.70            | <b>&lt;1E-16</b> | -0.41              | <b>&lt;1E-16</b> | -0.33          | <b>&lt;1E-16</b> | 0.26       | <b>&lt;1E-16</b> |
|                          | ECO | -0.80            | <b>&lt;1E-16</b> | -0.77            | <b>&lt;1E-16</b> | -0.48              | <b>&lt;1E-16</b> | -0.34          | <b>&lt;1E-16</b> | 0.36       | <b>&lt;1E-16</b> |
|                          | TGA | -0.67            | <b>&lt;1E-16</b> | -0.67            | <b>&lt;1E-16</b> | -0.45              | <b>&lt;1E-16</b> | -0.44          | <b>&lt;1E-16</b> | 0.19       | 5.11E-11         |
|                          | HAL | -0.81            | <b>&lt;1E-16</b> | -0.81            | <b>&lt;1E-16</b> | -0.30              | <b>&lt;1E-16</b> | -0.25          | <b>&lt;1E-16</b> | 0.19       | <b>&lt;1E-16</b> |
|                          | DEI | -0.83            | <b>&lt;1E-16</b> | -0.83            | <b>&lt;1E-16</b> | -0.25              | <b>&lt;1E-16</b> | -0.30          | <b>&lt;1E-16</b> | 0.10       | 1.24E-05         |
| $\Delta G_{\text{min}}$  | CEL | -0.34            | <b>&lt;1E-16</b> | -0.51            | <b>&lt;1E-16</b> | -0.53              | <b>&lt;1E-16</b> | -0.63          | <b>&lt;1E-16</b> |            |                  |
|                          | HSA | -0.71            | <b>&lt;1E-16</b> | -0.78            | <b>&lt;1E-16</b> | -0.43              | <b>&lt;1E-16</b> | -0.60          | <b>&lt;1E-16</b> |            |                  |
|                          | DME | -0.35            | <b>&lt;1E-16</b> | -0.52            | <b>&lt;1E-16</b> | -0.54              | <b>&lt;1E-16</b> | -0.64          | <b>&lt;1E-16</b> |            |                  |
|                          | SCE | -0.23            | <b>&lt;1E-16</b> | -0.45            | <b>&lt;1E-16</b> | -0.51              | <b>&lt;1E-16</b> | -0.61          | <b>&lt;1E-16</b> |            |                  |
|                          | ASP | -0.33            | <b>&lt;1E-16</b> | -0.42            | <b>&lt;1E-16</b> | -0.49              | <b>&lt;1E-16</b> | -0.55          | <b>&lt;1E-16</b> |            |                  |
|                          | NEU | -0.29            | <b>&lt;1E-16</b> | -0.42            | <b>&lt;1E-16</b> | -0.53              | <b>&lt;1E-16</b> | -0.59          | <b>&lt;1E-16</b> |            |                  |
|                          | BSU | -0.58            | <b>&lt;1E-16</b> | -0.49            | <b>&lt;1E-16</b> | -0.66              | <b>&lt;1E-16</b> | -0.59          | <b>&lt;1E-16</b> |            |                  |
|                          | MET | -0.47            | <b>&lt;1E-16</b> | -0.41            | <b>&lt;1E-16</b> | -0.66              | <b>&lt;1E-16</b> | -0.63          | <b>&lt;1E-16</b> |            |                  |
|                          | ECO | -0.57            | <b>&lt;1E-16</b> | -0.46            | <b>&lt;1E-16</b> | -0.66              | <b>&lt;1E-16</b> | -0.59          | <b>&lt;1E-16</b> |            |                  |
|                          | TGA | -0.36            | <b>&lt;1E-16</b> | -0.32            | <b>&lt;1E-16</b> | -0.62              | <b>&lt;1E-16</b> | -0.61          | <b>&lt;1E-16</b> |            |                  |
|                          | HAL | -0.58            | <b>&lt;1E-16</b> | -0.60            | <b>&lt;1E-16</b> | -0.60              | <b>&lt;1E-16</b> | -0.62          | <b>&lt;1E-16</b> |            |                  |
|                          | DEI | -0.53            | <b>&lt;1E-16</b> | -0.57            | <b>&lt;1E-16</b> | -0.52              | <b>&lt;1E-16</b> | -0.56          | <b>&lt;1E-16</b> |            |                  |

**Supplementary Table 2:** A, partial correlation analysis between mRNA folding energy ( $\Delta G_{\text{mean}}$  and  $\Delta G_{\text{min}}$ ), protein size (size) and messenger GC content (GC). B, correlation between GC and size. CEL, HSA, DME, SCE, ASP, NEU, BSU, MET, ECO, TGA, HAL, DEI correspond respectively to *Caenorhabditis elegans*, *Homo sapiens*, *Drosophila melanogaster*, *Saccharomyces cerevisiae*, *Aspergillus oryzae*, *Neurospora crassa*, *Bacillus subtilis*, *Methanosarcina. Marzei*, *Escherichia coli*, *Thermococcus gammatolerans*, *Haloferax volcanii*, *Deinococcus radiodurans*. Correlation and partial correlation were estimated using Spearman's rank correlation (SP). Significance is indicated by pvalue inferior to 0.05 and is displayed in bold. We used the transcriptome dataset.

|         |     | $\Delta G_{\text{mean}}$ vs ACC |                  |          |                 | $\Delta G_{\text{min}}$ vs ACC |                  |          |                 |
|---------|-----|---------------------------------|------------------|----------|-----------------|--------------------------------|------------------|----------|-----------------|
|         |     | Order                           |                  | Disorder |                 | Order                          |                  | Disorder |                 |
| species |     | SP                              |                  | SP       |                 | SP                             |                  | SP       |                 |
| SEGHCA  | HSA | 0.29                            | <b>1.48E-11</b>  | 0.13     | <b>3.40E-02</b> | 0.39                           | <b>&lt;1E-16</b> | 0.16     | <b>9.95E-03</b> |
|         | SCE | 0.15                            | <b>3.71E-02</b>  | 0.05     | 6.51E-01        | 0.50                           | <b>7.31E-13</b>  | 0.11     | 3.19E-01        |
|         | BSU | 0.51                            | <b>1.77E-10</b>  | 0.04     | 7.70E-01        | 0.59                           | <b>2.05E-14</b>  | 0.25     | 7.64E-02        |
|         | ECO | 0.43                            | <b>&lt;1E-16</b> | 0.22     | <b>9.55E-04</b> | 0.53                           | <b>&lt;1E-16</b> | 0.29     | <b>1.12E-05</b> |
|         | TGA | 0.37                            | <b>1.73E-04</b>  | 0.16     | 4.10E-01        | 0.39                           | <b>7.55E-05</b>  | 0.31     | 9.82E-02        |
| IUPRED  | HSA | 0.28                            | <b>6.76E-11</b>  | 0.12     | <b>1.16E-02</b> |                                |                  |          |                 |
|         | SCE | 0.14                            | 6.00E-02         | 0.06     | 4.34E-01        |                                |                  |          |                 |
|         | BSU | 0.49                            | <b>7.28E-10</b>  | 0.11     | 2.00E-01        |                                |                  |          |                 |
|         | ECO | 0.40                            | <b>&lt;1E-16</b> | 0.19     | <b>1.02E-04</b> |                                |                  |          |                 |
|         | TGA | 0.39                            | <b>1.01E-04</b>  | -0.01    | 9.20E-01        |                                |                  |          |                 |

**Supplementary Table 3:** Correlations between mRNA folding energy ( $\Delta G_{\text{mean}}$  and  $\Delta G_{\text{min}}$ ) and protein solvent accessibility (ACC) in ordered and disordered part of the protein define using SEGHCA and IUPRED. Correlations were estimated using Spearman's rank correlation (SP). Significance is indicated by pvalue inferior to 0.05 and is displayed in bold. HSA, SCE, BSU, ECO, TGA correspond respectively to *H. sapiens*, *S. cerevisiae*, *B. subtilis*, *E. coli* and *T. gammatolerans*. As protein solvent accessibility requires protein structures, we used here the structural dataset.

|         | whole protein                 |                  | order                         |                  | disorder                      |                 |
|---------|-------------------------------|------------------|-------------------------------|------------------|-------------------------------|-----------------|
|         | $\Delta G3\text{mean vs acc}$ |                  | $\Delta G3\text{mean vs acc}$ |                  | $\Delta G3\text{mean vs acc}$ |                 |
| species | SP                            |                  | SP                            |                  | SP                            |                 |
| HSA     | 0.30                          | <b>4.08E-12</b>  | 0.30                          | <b>4.08E-12</b>  | 0.15                          | <b>7.02E-03</b> |
| ECO     | 0.45                          | <b>&lt;1E-16</b> | 0.43                          | <b>&lt;1E-16</b> | 0.21                          | <b>1.70E-04</b> |

**Supplementary Table 4:** Correlation between mRNA folding energy ( $\Delta G3\text{mean}$ ) estimated from a 3-nt window and protein solvent accessibility (ACC) considering the whole protein, ordered and disordered part of the protein in HSA (*H. sapiens*) and ECO (*E. coli*). Correlations were estimated using Spearman's rank correlation (SP). Significance is indicated by pvalue inferior to 0.05 and is displayed in bold. We used here the structural dataset.

|                   |       | dG vs GC        |                  | Controlling size |                  | GC vs size      |                 | dGmean vs size   |                  | Controlling GC   |                  |          |  |
|-------------------|-------|-----------------|------------------|------------------|------------------|-----------------|-----------------|------------------|------------------|------------------|------------------|----------|--|
| species           |       | SP              |                  | SP               |                  | SP              |                 | SP               |                  | SP               |                  |          |  |
| $\Delta G_{mean}$ | HSA   | -0.91           | <b>&lt;1E-16</b> | -0.93            | <b>&lt;1E-16</b> | 0.08            | 8.92E-02        | -0.26            | <b>1.21E-09</b>  | -0.48            | <b>&lt;1E-16</b> | Order    |  |
|                   | SCE   | -0.65           | <b>&lt;1E-16</b> | -0.70            | <b>&lt;1E-16</b> | -0.15           | <b>4.16E-02</b> | -0.18            | <b>1.35E-02</b>  | -0.37            | <b>5.91E-08</b>  |          |  |
|                   | BSU   | -0.73           | <b>&lt;1E-16</b> | -0.71            | <b>&lt;1E-16</b> | 0.28            | <b>7.30E-04</b> | -0.54            | <b>7.35E-12</b>  | -0.50            | <b>8.11E-12</b>  |          |  |
|                   | ECO   | -0.71           | <b>&lt;1E-16</b> | -0.67            | <b>4.75E-74</b>  | 0.32            | <b>2.29E-11</b> | -0.49            | <b>1.39E-25</b>  | -0.39            | <b>4.30E-17</b>  |          |  |
|                   | TGA   | -0.55           | <b>5.02E-09</b>  | -0.53            | <b>1.41E-09</b>  | 0.20            | <b>4.60E-02</b> | -0.50            | <b>2.11E-07</b>  | -0.47            | <b>2.03E-07</b>  | Disorder |  |
|                   | HSA   | -0.67           | <b>&lt;1E-16</b> | -0.67            | <b>&lt;1E-16</b> | 0.13            | <b>1.06E-02</b> | -0.03            | 6.04E-01         | 0.01             | 8.52E-01         |          |  |
|                   | SCE   | -0.19           | 5.48E-02         | -0.18            | 7.31E-02         | 0.02            | 8.40E-01        | -0.22            | <b>2.71E-02</b>  | -0.21            | <b>3.49E-02</b>  |          |  |
|                   | BSU   | -0.51           | <b>8.25E-05</b>  | -0.53            | <b>9.00E-06</b>  | 0.19            | <b>4.74E-02</b> | 0.03             | 8.17E-01         | 0.16             | 2.38E-01         |          |  |
| ECO               | -0.43 | <b>1.23E-11</b> | -0.42            | <b>1.35E-11</b>  | 0.09             | <b>1.04E-01</b> | -0.23           | <b>4.65E-04</b>  | -0.19            | <b>4.44E-03</b>  | Disorder         |          |  |
| TGA               | -0.15 | 4.22E-01        | -0.18            | 3.22E-01         | -0.09            | <b>4.43E-01</b> | -0.12           | 5.02E-01         | -0.16            | 3.75E-01         |                  |          |  |
| $\Delta G_{min}$  | HSA   | -0.67           | <b>&lt;1E-16</b> | -0.72            | <b>&lt;1E-16</b> |                 |                 | -0.47            | <b>&lt;1E-16</b> | -0.56            | <b>&lt;1E-16</b> | Order    |  |
|                   | SCE   | -0.28           | <b>1.00E-04</b>  | -0.45            | <b>1.44E-11</b>  |                 |                 | -0.56            | <b>&lt;1E-16</b> | -0.64            | <b>&lt;1E-16</b> |          |  |
|                   | BSU   | -0.58           | <b>&lt;1E-16</b> | -0.54            | <b>2.37E-14</b>  |                 |                 | -0.62            | <b>&lt;1E-16</b> | -0.58            | <b>&lt;1E-16</b> |          |  |
|                   | ECO   | -0.51           | <b>&lt;1E-16</b> | -0.42            | <b>&lt;1E-16</b> |                 |                 | -0.63            | <b>&lt;1E-16</b> | -0.57            | <b>&lt;1E-16</b> |          |  |
|                   | TGA   | -0.25           | <b>1.35E-02</b>  | -0.16            | 1.11E-01         |                 |                 | -0.61            | <b>2.79E-11</b>  | -0.59            | <b>1.10E-12</b>  | Disorder |  |
|                   | HSA   | -0.63           | <b>&lt;1E-16</b> | -0.65            | <b>&lt;1E-16</b> |                 |                 | -0.34            | <b>1.76E-09</b>  | -0.39            | <b>2.79E-13</b>  |          |  |
|                   | SCE   | -0.23           | <b>2.18E-02</b>  | -0.22            | <b>2.71E-02</b>  |                 |                 | -0.55            | <b>2.37E-09</b>  | -0.54            | <b>9.64E-11</b>  |          |  |
|                   | BSU   | -0.52           | <b>5.72E-05</b>  | -0.49            | <b>6.61E-05</b>  |                 |                 | -0.36            | <b>8.40E-03</b>  | -0.30            | <b>2.65E-02</b>  |          |  |
| ECO               | -0.38 | <b>7.42E-09</b> | -0.36            | <b>9.32E-09</b>  |                  |                 | -0.60           | <b>&lt;1E-16</b> | -0.59            | <b>&lt;1E-16</b> | Disorder         |          |  |
| TGA               | 0.06  | 7.34E-01        | -0.04            | 8.36E-01         |                  |                 | -0.42           | <b>1.54E-02</b>  | -0.42            | <b>1.21E-02</b>  |                  |          |  |

**Supplementary Table 5:** Partial correlation analysis between mRNA folding energy ( $\Delta G_{mean}$  and  $\Delta G_{min}$ ), protein size (size) and messenger GC content (GC) in ordered and disordered parts of the proteins. HSA, SCE, BSU, ECO, TGA correspond respectively to *H. sapiens*, *S. cerevisiae*, *B. subtilis*, *E. coli* and *T. gammatolerans*. Correlations were estimated using Spearman's rank correlation (SP). Significance is indicated by pvalue inferior to 0.05 and is displayed in bold. We used the structural set.

| species | ACC vs dN |                 | ACC vs dS |                 | ACC vs dN |                 | ACC vs dS |                 | ACC vs dN |                 | ACC vs dS |                 |
|---------|-----------|-----------------|-----------|-----------------|-----------|-----------------|-----------|-----------------|-----------|-----------------|-----------|-----------------|
|         | SP        |                 | SP        |                 | SP        |                 | SP        |                 | SP        |                 | SP        |                 |
| HSA     | -0.17     | <b>9.77E-05</b> | -0.03     | 5.04E-01        | -0.17     | <b>1.14E-04</b> | -0.03     | 4.42E-01        | -0.09     | 1.44E-01        | -0.14     | <b>2.75E-02</b> |
| SCE     | -0.30     | <b>3.76E-05</b> | -0.24     | <b>9.69E-04</b> | -0.33     | <b>6.79E-06</b> | -0.23     | <b>1.64E-03</b> | -0.28     | <b>8.95E-03</b> | -0.21     | 5.24E-02        |
| BSU     | -0.30     | <b>3.46E-04</b> | -0.32     | <b>1.16E-04</b> | -0.33     | <b>8.72E-05</b> | -0.32     | <b>1.52E-04</b> | 0.04      | 7.86E-01        | -0.03     | 8.42E-01        |
| ECO     | -0.19     | <b>1.20E-04</b> | -0.25     | <b>3.16E-07</b> | -0.19     | <b>1.35E-04</b> | -0.25     | <b>5.10E-07</b> | -0.05     | 4.70E-01        | -0.19     | <b>6.23E-03</b> |
| TGA     | -0.23     | <b>2.83E-02</b> | -0.33     | <b>1.18E-03</b> | -0.23     | <b>2.78E-02</b> | -0.32     | <b>1.76E-03</b> | 0.00      | 9.96E-01        | -0.39     | <b>3.58E-02</b> |

**Supplementary Table 6:** Correlations between protein solvent accessibility (ACC) and evolutionary rates (non-synonymous *dN* and synonymous *dS* rates). HSA, SCE, BSU, ECO, TGA correspond respectively to *H. sapiens*, *S. cerevisiae*, *B. subtilis*, *E. coli* and *T. gammatolerans*. Correlation was estimated using Spearman's rank correlation (SP). Significance is indicated by pvalue inferior to 0.05 and is displayed in bold. We used the structural set.

|                   |     | dG vs dN |                 | dG vs dS |                 | dG vs dN/dS |                 | dN vs dS |         |      |                 |  |
|-------------------|-----|----------|-----------------|----------|-----------------|-------------|-----------------|----------|---------|------|-----------------|--|
|                   |     | species  | SP              |          | SP              |             | SP              |          | species | GC   | SP              |  |
| $\Delta G_{mean}$ | CEL | 0.16     | <1E-16          | 0.21     | <1E-16          | 0.05        | <b>1.41E-04</b> | CEL      | 0.44    | 0.48 | <1E-16          |  |
|                   | HSA | -0.12    | <b>1.03E-08</b> | -0.36    | <1E-16          | 0.00        | 9.48E-01        | HSA      | 0.53    | 0.43 | <1E-16          |  |
|                   | DME | 0.19     | <1E-16          | 0.16     | <1E-16          | 0.14        | <1E-16          | DME      | 0.55    | 0.42 | <1E-16          |  |
|                   | SCE | 0.36     | <1E-16          | 0.25     | <1E-16          | 0.33        | <1E-16          | SCE      | 0.40    | 0.53 | <1E-16          |  |
|                   | ASP | 0.12     | <1E-16          | 0.04     | <b>3.83E-04</b> | 0.14        | <1E-16          | ASP      | 0.52    | 0.73 | <1E-16          |  |
|                   | NEU | 0.20     | <1E-16          | -0.10    | <1E-16          | 0.27        | <1E-16          | NEU      | 0.57    | 0.42 | <1E-16          |  |
|                   | BSU | -0.02    | 3.43E-01        | -0.14    | <b>8.51E-15</b> | 0.05        | 1.11E-02        | BSU      | 0.44    | 0.48 | <1E-16          |  |
|                   | MET | 0.20     | <1E-16          | 0.10     | <b>5.67E-06</b> | 0.20        | <1E-16          | MET      | 0.45    | 0.55 | <1E-16          |  |
|                   | ECO | -0.03    | 1.18E-01        | -0.02    | 2.67E-01        | 0.01        | 7.53E-01        | ECO      | 0.52    | 0.68 | <1E-16          |  |
|                   | TGA | -0.06    | <b>4.51E-02</b> | -0.01    | 7.55E-01        | -0.05       | 8.10E-02        | TGA      | 0.55    | 0.43 | <1E-16          |  |
|                   | HAL | -0.36    | <1E-16          | -0.34    | <1E-16          | -0.19       | <1E-16          | HAL      | 0.68    | 0.60 | <1E-16          |  |
|                   | DEI | -0.22    | <b>4.13E-05</b> | -0.28    | <b>5.77E-08</b> | -0.05       | 3.14E-01        | DEI      | 0.65    | 0.39 | <b>3.02E-14</b> |  |
| $\Delta G_{min}$  | CEL | 0.02     | 8.55E-02        | -0.02    | 1.63E-01        | 0.03        | <b>2.37E-02</b> |          |         |      |                 |  |
|                   | HSA | -0.12    | <b>4.78E-09</b> | -0.27    | <1E-16          | -0.04       | <b>6.65E-02</b> |          |         |      |                 |  |
|                   | DME | 0.01     | 6.33E-01        | 0.05     | <b>1.70E-03</b> | -0.01       | 3.75E-01        |          |         |      |                 |  |
|                   | SCE | 0.06     | <b>1.14E-04</b> | -0.01    | 6.72E-01        | 0.07        | <b>1.34E-06</b> |          |         |      |                 |  |
|                   | ASP | 0.12     | <1E-16          | 0.14     | <1E-16          | 0.06        | <b>2.10E-06</b> |          |         |      |                 |  |
|                   | NEU | 0.10     | <1E-16          | -0.07    | <b>4.28E-08</b> | 0.14        | <1E-16          |          |         |      |                 |  |
|                   | BSU | -0.06    | <b>4.03E-04</b> | -0.20    | <1E-16          | 0.02        | 3.77E-01        |          |         |      |                 |  |
|                   | MET | 0.03     | 1.90E-01        | -0.05    | <b>1.13E-02</b> | 0.08        | <b>8.17E-05</b> |          |         |      |                 |  |
|                   | ECO | -0.06    | <b>4.84E-03</b> | -0.11    | <b>1.00E-06</b> | 0.04        | 1.03E-01        |          |         |      |                 |  |
|                   | TGA | -0.10    | <b>6.91E-04</b> | -0.08    | <b>4.88E-03</b> | -0.06       | <b>4.96E-02</b> |          |         |      |                 |  |
|                   | HAL | -0.15    | <b>2.81E-12</b> | -0.24    | <1E-16          | 0.02        | 2.88E-01        |          |         |      |                 |  |
|                   | DEI | -0.05    | 3.42E-01        | -0.23    | <b>1.10E-05</b> | 0.10        | <b>6.89E-02</b> |          |         |      |                 |  |

**Supplementary Table 7:** A, correlation between mRNA folding energy ( $\Delta G_{mean}$  and  $\Delta G_{min}$ ) and evolutionary rates (non-synonymous  $dN$  and synonymous  $dS$  rates). B, correlation between  $dN$  and  $dS$ . HSA, SCE, BSU, ECO, TGA correspond respectively to *H. sapiens*, *S. cerevisiae*, *B. subtilis*, *E. coli* and *T. gammatolerans*. Correlation was estimated using Spearman's rank correlation (SP). Significance is indicated by pvalue inferior to 0.05 and is displayed in bold. We used the transcriptome set.

|           |           | $\Delta G_{\text{mean}}$<br>vs TE |                  | $\Delta G_{\text{min}}$ vs<br>TE |                  | GC vs TE |                  | Size vs TE |                  | dN vs TE |                  | dS vs TE |                  | Abundance<br>vs TE |                  |
|-----------|-----------|-----------------------------------|------------------|----------------------------------|------------------|----------|------------------|------------|------------------|----------|------------------|----------|------------------|--------------------|------------------|
| condition |           | SP                                |                  | SP                               |                  | SP       |                  | SP         |                  | SP       |                  | SP       |                  | SP                 |                  |
| ECO       | lb        | 0.37                              | <b>&lt;1E-16</b> | 0.28                             | <b>&lt;1E-16</b> | -0.26    | <b>&lt;1E-16</b> | -0.25      | <b>&lt;1E-16</b> | -0.06    | <b>2.14E-02</b>  | -0.01    | 6.27E-01         | 0.27               | <b>&lt;1E-16</b> |
|           | heat      | 0.36                              | <b>&lt;1E-16</b> | 0.29                             | <b>&lt;1E-16</b> | -0.31    | <b>&lt;1E-16</b> | -0.27      | <b>&lt;1E-16</b> | -0.05    | 5.12E-02         | 0.01     | 7.31E-01         | 0.27               | <b>&lt;1E-16</b> |
|           | mm        | 0.34                              | <b>&lt;1E-16</b> | 0.25                             | <b>&lt;1E-16</b> | -0.24    | <b>&lt;1E-16</b> | -0.16      | <b>1.89E-11</b>  | -0.07    | <b>4.77E-03</b>  | 0.02     | 5.36E-01         | 0.36               | <b>&lt;1E-16</b> |
|           | osm       | 0.33                              | <b>&lt;1E-16</b> | 0.25                             | <b>&lt;1E-16</b> | -0.24    | <b>&lt;1E-16</b> | -0.22      | <b>&lt;1E-16</b> | -0.05    | <b>3.47E-02</b>  | -0.01    | 6.26E-01         | 0.37               | <b>&lt;1E-16</b> |
| HSA       | g2        | 0.43                              | <b>&lt;1E-16</b> | 0.41                             | <b>&lt;1E-16</b> | -0.35    | <b>&lt;1E-16</b> | -0.39      | <b>&lt;1E-16</b> | -0.04    | 1.65E-01         | -0.13    | 6.39E-05         | 0.15               | <b>1.22E-06</b>  |
|           | m         | 0.01                              | 8.49E-01         | 0.11                             | <b>6.38E-04</b>  | 0.08     | <b>8.59E-03</b>  | -0.39      | <b>&lt;1E-16</b> | -0.02    | 4.45E-01         | 0.03     | 2.80E-01         | 0.25               | <b>1.36E-15</b>  |
|           | g1        | -0.04                             | 2.20E-01         | -0.01                            | 7.62E-01         | 0.12     | <b>2.21E-04</b>  | -0.23      | <b>3.71E-13</b>  | -0.06    | <b>6.55E-02</b>  | 0.05     | 9.96E-02         | 0.19               | <b>4.93E-09</b>  |
| SCE       | ypd       | -0.01                             | 4.68E-01         | 0.02                             | 1.11E-01         | 0.19     | <b>&lt;1E-16</b> | -0.08      | <b>4.41E-08</b>  | -0.36    | <b>&lt;1E-16</b> | -0.23    | <b>&lt;1E-16</b> | 0.60               | <b>&lt;1E-16</b> |
|           | nochx     | -0.03                             | <b>4.96E-02</b>  | 0.01                             | 4.32E-01         | 0.19     | <b>&lt;1E-16</b> | -0.08      | <b>8.92E-07</b>  | -0.39    | <b>&lt;1E-16</b> | -0.25    | <b>&lt;1E-16</b> | 0.62               | <b>&lt;1E-16</b> |
|           | diamide   | -0.06                             | <b>4.49E-05</b>  | 0.06                             | <b>3.09E-04</b>  | 0.24     | <b>&lt;1E-16</b> | -0.19      | <b>&lt;1E-16</b> | -0.39    | <b>&lt;1E-16</b> | -0.24    | <b>&lt;1E-16</b> | 0.60               | <b>&lt;1E-16</b> |
|           | rapamycin | 0.11                              | 1.71E-13         | 0.13                             | <b>&lt;1E-16</b> | 0.02     | <b>2.25E-01</b>  | -0.15      | <b>&lt;1E-16</b> | -0.34    | <b>&lt;1E-16</b> | -0.19    | <b>&lt;1E-16</b> | 0.56               | <b>&lt;1E-16</b> |

**Supplementary Table 8:** Correlations analysis between translation efficiency (TE), mRNA folding energy ( $\Delta G_{\text{mean}}$  and  $\Delta G_{\text{min}}$ ), protein size (size),  $dN$ ,  $dS$  and protein abundance. ECO, HAS, SCE correspond respectively to *E. coli*, *H. sapiens*, and *S. cerevisiae*. Conditions are described in **Materials**. Correlation and partial correlations were estimated using the Spearman's rank correlation (SP). Significance is indicated by pvalue inferior to 0.05 and is displayed in bold. We used the transcriptome set restricted to translation efficiency and protein abundance available data.



|         | ACC vs Abundance |                 |
|---------|------------------|-----------------|
| species | SP               |                 |
| HSA     | 0.17             | <b>1.01E-04</b> |
| SCE     | 0.10             | 1.66E-01        |
| BSU     | 0.36             | <b>1.12E-05</b> |
| ECO     | 0.19             | <b>1.45E-04</b> |
| TGA     | -0.13            | 1.89E-01        |

**Supplementary Table 9:** Correlations between protein solvent accessibility (ACC) and protein abundance (abundance). HSA, SCE, BSU, ECO, TGA correspond respectively to *H. sapiens*, *S. cerevisiae*, *B. subtilis*, *E. coli* and *T. gammatolerans*. Correlations were estimated using the Spearman's rank correlation (SP). Significance is indicated by pvalue inferior to 0.05 and is displayed in bold. We used the structural database restricted to the protein abundance available data.

|                   |     | dG vs Abundance |                  | Controlling GC |                  | Controlling size |                  | Controlling GC and size |                  |
|-------------------|-----|-----------------|------------------|----------------|------------------|------------------|------------------|-------------------------|------------------|
| species           |     | SP              |                  | SP             |                  | SP               |                  | SP                      |                  |
| $\Delta G_{mean}$ | CEL | -0.23           | <b>&lt;1E-16</b> | 0.05           | <b>2.35E-06</b>  | -0.27            | <b>&lt;1E-16</b> | -0.01                   | 3.42E-01         |
|                   | HSA | 0.10            | <b>1.81E-06</b>  | 0.01           | 5.87E-01         | 0.07             | <b>4.90E-04</b>  | -0.06                   | <b>1.47E-03</b>  |
|                   | DME | -0.06           | <b>2.09E-05</b>  | 0.13           | <b>7.75E-25</b>  | -0.10            | <b>4.23E-14</b>  | 0.03                    | <b>8.18E-03</b>  |
|                   | SCE | -0.26           | <b>&lt;1E-16</b> | -0.10          | <b>4.77E-11</b>  | -0.28            | <b>&lt;1E-16</b> | -0.13                   | <b>&lt;1E-16</b> |
|                   | BSU | 0.13            | <b>1.06E-13</b>  | 0.15           | <b>1.02E-16</b>  | 0.07             | <b>4.82E-05</b>  | 0.11                    | <b>3.79E-09</b>  |
|                   | ECO | 0.19            | <b>&lt;1E-16</b> | 0.23           | <b>&lt;1E-16</b> | 0.14             | <b>3.59E-11</b>  | 0.19                    | <b>&lt;1E-16</b> |
|                   | TGA | -0.02           | 5.04E-01         | 0.16           | <b>4.71E-09</b>  | -0.04            | 1.37E-01         | 0.14                    | <b>4.13E-07</b>  |
| $\Delta G_{min}$  | CEL | -0.01           | 1.85E-01         | 0.13           | <b>&lt;1E-16</b> | -0.14            | <b>&lt;1E-16</b> | 0.05                    | <b>1.27E-06</b>  |
|                   | HSA | 0.14            | <b>2.42E-12</b>  | 0.10           | <b>6.54E-07</b>  | 0.08             | <b>2.94E-05</b>  | 0.01                    | 5.97E-01         |
|                   | DME | 0.13            | <b>&lt;1E-16</b> | 0.22           | <b>&lt;1E-16</b> | -0.03            | <b>1.05E-02</b>  | 0.05                    | <b>4.19E-05</b>  |
|                   | SCE | -0.03           | <b>3.46E-02</b>  | 0.04           | <b>6.18E-03</b>  | -0.13            | <b>&lt;1E-16</b> | 0.00                    | 7.61E-01         |
|                   | BSU | 0.14            | <b>6.73E-15</b>  | 0.13           | <b>8.65E-14</b>  | 0.07             | <b>1.87E-04</b>  | 0.07                    | <b>3.72E-05</b>  |
|                   | ECO | 0.19            | <b>&lt;1E-16</b> | 0.18           | <b>&lt;1E-16</b> | 0.13             | <b>2.98E-09</b>  | 0.13                    | <b>6.82E-10</b>  |
|                   | TGA | 0.03            | 3.38E-01         | 0.11           | <b>7.63E-05</b>  | 0.00             | 9.54E-01         | 0.08                    | <b>6.44E-03</b>  |

**Supplementary Table 10:** Correlations between mRNA folding energy ( $\Delta G_{mean}$  and  $\Delta G_{min}$ ) and protein abundance (abundance) controlling GC content (GC) and protein size (size). CEL, HSA, DME, SCE, BSU, ECO and TGA correspond, respectively to *C. elegans*, *H. sapiens*, *D. melanogaster*, *S. cerevisiae*, *B. subtilis*, *E. coli* and *T. gammatolerans*. Correlations and partial correlations were estimated using the Spearman's rank correlation (SP). Significance is indicated by pvalue inferior to 0.05 and is displayed in bold. We used the transcriptome set.

|  |           | $\Delta G$ vs TE  |            | Controlling GC |          | Controlling size |          | Controlling abundance |          | Controlling GC, size, abundance |          |          |          |
|--|-----------|-------------------|------------|----------------|----------|------------------|----------|-----------------------|----------|---------------------------------|----------|----------|----------|
|  |           | SP                |            | SP             |          | SP               |          | SP                    |          | SP                              |          |          |          |
|  | condition |                   |            |                |          |                  |          |                       |          |                                 |          |          |          |
|  |           | $\Delta G_{mean}$ | ECO        | lb             | 0.38     | <1E-16           | 0.28     | <1E-16                | 0.30     | <1E-16                          | 0.35     | <1E-16   | 0.20     |
|  |           | heat              | 0.38       | <1E-16         | 0.21     | <1E-16           | 0.28     | <1E-16                | 0.35     | <1E-16                          | 0.11     | 1.19E-06 |          |
|  |           | mm                | 0.35       | <1E-16         | 0.26     | <1E-16           | 0.31     | <1E-16                | 0.31     | <1E-16                          | 0.19     | <1E-16   |          |
|  |           | o sm              | 0.34       | <1E-16         | 0.25     | <1E-16           | 0.26     | <1E-16                | 0.29     | <1E-16                          | 0.15     | 8.83E-11 |          |
|  |           | HSA               | g2         | 0.42           | <1E-16   | 0.28             | <1E-16   | 0.41                  | <1E-16   | 0.43                            | <1E-16   | 0.14     | 3.76E-06 |
|  |           |                   | m          | 0.02           | 6.22E-01 | 0.24             | 6.89E-15 | -0.04                 | 2.43E-01 | 0.02                            | 5.58E-01 | 0.11     | 3.20E-04 |
|  |           |                   | g1         | -0.04          | 2.11E-01 | 0.19             | 2.74E-10 | -0.07                 | 2.69E-02 | -0.04                           | 2.24E-01 | 0.13     | 2.79E-05 |
|  |           | SCE               | y pd       | -0.01          | 6.28E-01 | 0.14             | <1E-16   | -0.01                 | 3.29E-01 | 0.19                            | <1E-16   | 0.26     | <1E-16   |
|  |           |                   | nochx      | -0.03          | 7.01E-02 | 0.11             | 1.02E-13 | -0.03                 | 2.34E-02 | 0.18                            | <1E-16   | 0.24     | <1E-16   |
|  |           |                   | diamide    | -0.06          | 7.32E-05 | 0.11             | 8.87E-14 | -0.08                 | 2.76E-07 | 0.12                            | <1E-16   | 0.18     | <1E-16   |
|  |           |                   | rapamy cin | 0.12           | 3.19E-14 | 0.16             | <1E-16   | 0.11                  | 6.36E-12 | 0.33                            | <1E-16   | 0.24     | <1E-16   |
|  | condition |                   |            |                |          |                  |          |                       |          |                                 |          |          |          |
|  |           | $\Delta G_{min}$  | ECO        | lb             | 0.31     | <1E-16           | 0.19     | <1E-16                | 0.19     | 1.38E-15                        | 0.27     | <1E-16   | 0.08     |
|  |           |                   | heat       | 0.31           | <1E-16   | 0.17             | 1.28E-12 | 0.16                  | 6.64E-12 | 0.28                            | <1E-16   | 0.03     | 1.89E-01 |
|  |           |                   | mm         | 0.27           | <1E-16   | 0.16             | 1.46E-11 | 0.20                  | <1E-16   | 0.22                            | <1E-16   | 0.09     | 2.95E-04 |
|  |           |                   | o sm       | 0.27           | <1E-16   | 0.17             | 6.04E-13 | 0.16                  | 2.55E-11 | 0.22                            | <1E-16   | 0.05     | 4.06E-02 |
|  |           | HSA               | g2         | 0.41           | <1E-16   | 0.25             | <1E-16   | 0.31                  | <1E-16   | 0.40                            | <1E-16   | 0.00     | 9.01E-01 |
|  |           |                   | m          | 0.12           | 1.03E-04 | 0.25             | <1E-16   | -0.03                 | 3.04E-01 | 0.10                            | 8.25E-04 | 0.04     | 2.06E-01 |
|  |           |                   | g1         | -0.01          | 7.52E-01 | 0.11             | 5.45E-04 | -0.10                 | 7.89E-04 | -0.02                           | 4.22E-01 | -0.02    | 4.70E-01 |
|  |           | SCE               | y pd       | 0.03           | 5.58E-02 | 0.07             | 1.03E-06 | -0.02                 | 2.32E-01 | 0.06                            | 1.30E-04 | 0.08     | 5.07E-08 |
|  |           |                   | nochx      | 0.02           | 2.75E-01 | 0.06             | 5.24E-05 | -0.03                 | 6.68E-02 | 0.05                            | 3.13E-03 | 0.07     | 1.11E-06 |
|  |           |                   | diamide    | 0.06           | 9.89E-05 | 0.12             | 2.43E-15 | -0.04                 | 3.46E-03 | 0.10                            | 2.81E-10 | 0.06     | 2.86E-05 |
|  |           |                   | rapamy cin | 0.13           | <1E-16   | 0.14             | <1E-16   | 0.06                  | 6.02E-05 | 0.18                            | <1E-16   | 0.07     | 1.96E-06 |

|     |            | GC vs TE |          | Size vs TE |          | TE vs abundance |          |
|-----|------------|----------|----------|------------|----------|-----------------|----------|
|     |            | SP       |          | SP         |          | SP              |          |
| ECO | lb         | -0.27    | <1E-16   | -0.26      | <1E-16   | 0.26            | <1E-16   |
|     | heat       | -0.32    | <1E-16   | -0.30      | <1E-16   | 0.26            | <1E-16   |
|     | mm         | -0.25    | <1E-16   | -0.18      | <1E-16   | 0.35            | <1E-16   |
|     | o sm       | -0.24    | <1E-16   | -0.24      | <1E-16   | 0.37            | <1E-16   |
| HSA | g2         | -0.35    | <1E-16   | -0.39      | <1E-16   | 0.15            | 8.84E-07 |
|     | m          | 0.08     | 9.49E-03 | -0.39      | <1E-16   | 0.24            | 1.09E-15 |
|     | g1         | 0.12     | 9.15E-05 | -0.22      | 4.24E-13 | 0.18            | 1.05E-08 |
| SCE | y pd       | 0.19     | <1E-16   | -0.09      | 5.63E-09 | 0.59            | <1E-16   |
|     | nochx      | 0.19     | <1E-16   | -0.08      | 1.24E-07 | 0.62            | <1E-16   |
|     | diamide    | 0.24     | <1E-16   | -0.19      | <1E-16   | 0.59            | <1E-16   |
|     | rapamy cin | 0.02     | 2.45E-01 | -0.15      | <1E-16   | 0.56            | <1E-16   |

**Supplementary Table 11:** A, correlation and partial correlation analysis between Translation efficiency (TE) and mRNA folding energy ( $\Delta G_{mean}$ ) controlling GC content (GC), protein size (size), and protein abundance (abundance). B, correlation between TE and GC, size and abundance. Correlation and partial correlations were estimated using the Spearman's rank correlation (SP). ECO, HSA, SCE correspond respectively to *E. coli*, *H. sapiens*, *S. cerevisiae*.

Significance is indicated by pvalue inferior to 0.05 and is displayed in bold. Conditions are described in **Materials**. We used the transcriptome set restricted to translation efficiency available data.

|        |     | Controlling ALL |          |
|--------|-----|-----------------|----------|
|        |     | SP              |          |
| dGmean | HSA | 0.04            | 3.91E-01 |
|        | SCE | 0.14            | 7.42E-02 |
|        | BSU | 0.11            | 2.39E-01 |
|        | ECO | -0.05           | 3.25E-01 |
|        | TGA | 0.10            | 3.81E-01 |
| dGmin  | HSA | -0.06           | 2.08E-01 |
|        | SCE | 0.10            | 1.86E-01 |
|        | BSU | 0.09            | 3.33E-01 |
|        | ECO | -0.02           | 7.52E-01 |
|        | TGA | -0.05           | 6.50E-01 |

**Supplementary Table 12:** Partial correlation analysis between  $\Delta G$  ( $\Delta G_{\text{mean}}$  and  $\Delta G_{\text{min}}$ ) and protein solvent accessibility controlling for GC content, protein size,  $dN$ ,  $dS$ , protein abundance and the fractions of 6 groups of amino acids (see Methods). We used the structural set.

| Species                 | Abbreviation |           | Close species for ortholog identification                                   | Orthologous Database | Nb messenger | Nb structure |
|-------------------------|--------------|-----------|-----------------------------------------------------------------------------|----------------------|--------------|--------------|
| <i>C.elegans</i>        | CEL          | Eukaryote | <i>C.briggsae</i>                                                           | OMA                  | 8333         |              |
| <i>H.sapiens</i>        | HSA          | Eukaryote | <i>M. musculus</i>                                                          | OMA                  | 2432         | 512          |
| <i>D.melanogaster</i>   | DME          | Eukaryote | <i>D.pseudoobscura</i>                                                      | OMA                  | 5710         |              |
| <i>S.cerevisiae</i>     | SCE          | Eukaryote | <i>S. paradoxus, S. mikitae, S. kudriavzevii and S. bayanus var. uravum</i> | SensuStricto         | 4441         | 184          |
| <i>A. oryzae</i>        | ASP          | Eukaryote | <i>A.flavus</i>                                                             | OMA                  | 9371         |              |
| <i>N. crassa</i>        | NEU          | Eukaryote | <i>N. tetrasperma</i>                                                       | OMA                  | 6624         |              |
| <i>B. subtilis</i>      | BSU          | Bacteria  | <i>B. subtilis sbsp. Sprizzenii</i>                                         | OMA                  | 3059         | 141          |
| <i>M. mazei</i>         | MET          | Bacteria  | <i>M. acetivorans</i>                                                       | OMA                  | 2262         |              |
| <i>E. coli</i>          | ECO          | Bacteria  | <i>S. typhi</i>                                                             | OMA                  | 2133         | 407          |
| <i>T. gammatolerans</i> | TGA          | Archaea   | <i>T.AM4_iu54 735</i>                                                       | ACGT                 | 1236         | 97           |
| <i>H. volcanii</i>      | HAL          | Bacteria  | <i>H. mediterranei</i>                                                      | OMA                  | 2558         |              |
| <i>D. radiodurans</i>   | DEI          | Bacteria  | <i>D. deserti</i>                                                           | OMA                  | 1936         |              |

| Abbreviations |                                 |
|---------------|---------------------------------|
| ACC           | Solvent Accessibility value     |
| dN            | Rate of non-synonymous mutation |
| dS            | Rate of synonymous mutation     |
| size          | protein length                  |
| TE            | Translation Efficiency          |
| GC            | Guanine Cytosine content        |
| ER            | Evolutionary Rate               |
| dG            | mRNA folding energy             |
| RSA           | Relative solvent accessibility  |
| MLR           | Multiple Linear Regression      |

**Supplementary Dataset 1.** Name of the species used in the study with their abbreviations. Close species used to estimate evolutionary rates (see **Methods**), and orthologous databases used. Number of messenger used in the transcriptome and number of protein used in the structural set. Second table shows the abbreviations used in the main text.

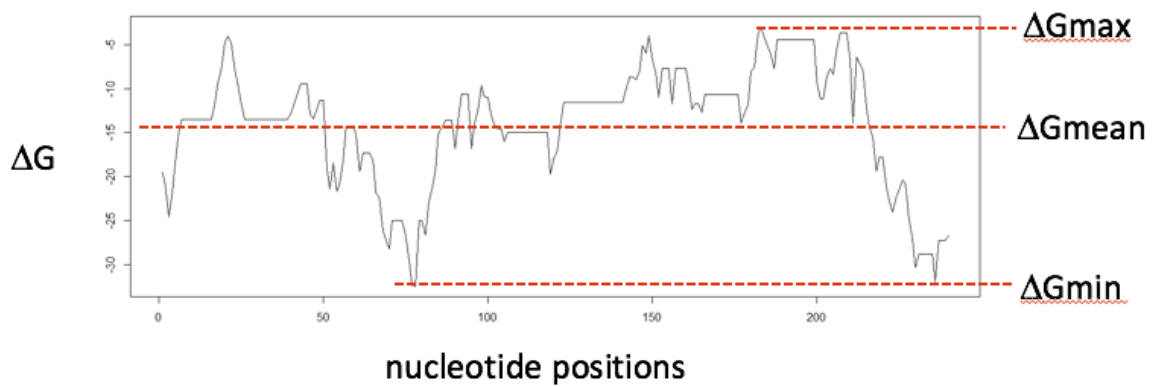

**Supplementary Figure 1:** A:  $\Delta G$  profile of TIM9 Human messenger. Average of  $\Delta G$  ( $\Delta G_{mean}$ ) is -13.7 kcal/mol while the most stable part of the messenger ( $\Delta G_{min}$ ) has an energy below -30 kcal/mol around position 75.

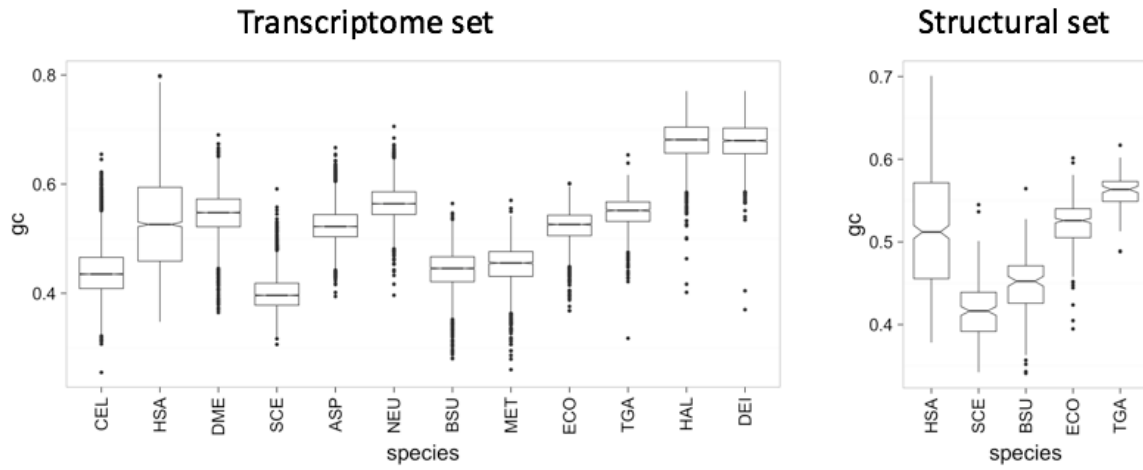

**Supplementary Figure 2:** Distribution of the mRNA GC-content for each species among the transcriptome set and the structural set. SCE, CEL, BSU, MET, ASP, ECO, HSA, DME, TGA, NEU, DEI, HAL denote, respectively, *S. cerevisiae*, *C. elegans*, *B. subtilis*, *M.mazei*, *A.orizae*, *E. coli*, *H. sapiens*, *D. melanogaster*, *T. gammatolerans*, *D. radiodurans*, *H. volvanii*.



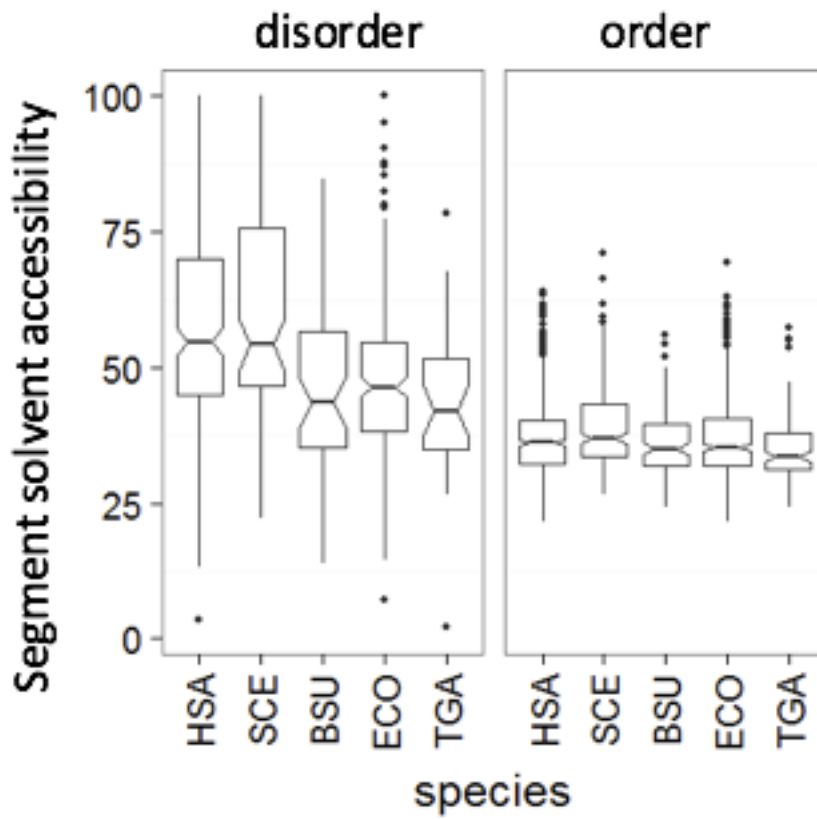

**Supplementary Figure 3:** Distribution of protein solvent accessibility among disordered and ordered part of the protein. HSA, SCE, BSU, ECO, TGA correspond respectively to *H. sapiens*, *S. cerevisiae*, *B. subtilis*, *E. coli* and *T. gammatolerans*.

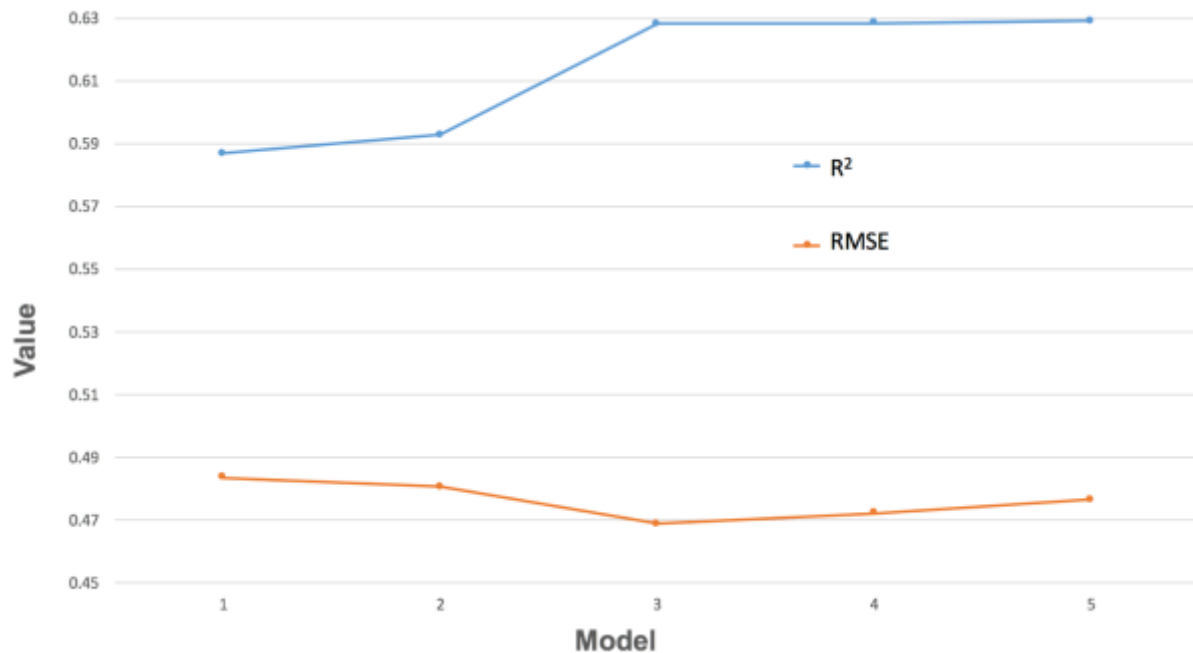

**Supplementary Figure 4.** Cross validation of multiple regression models. The vertical axis shows the fraction of the protein solvent accessibility variance ( $R^2$ ) that is explained by the models including different combinations of variables and the root mean squared error (RMSE) values for 5 different models: 1 – size; 2 – size and  $\Delta G$ ; 3- size,  $\Delta G$  and  $dS$ ; 4 – size,  $\Delta G$ ,  $dS$  and  $dN$ ; 5 – size,  $\Delta G$ ,  $dS$ ,  $dN$  and GC-content. The optimal model includes the first three variables whereas the remaining two variables should be discarded.

Y=TE

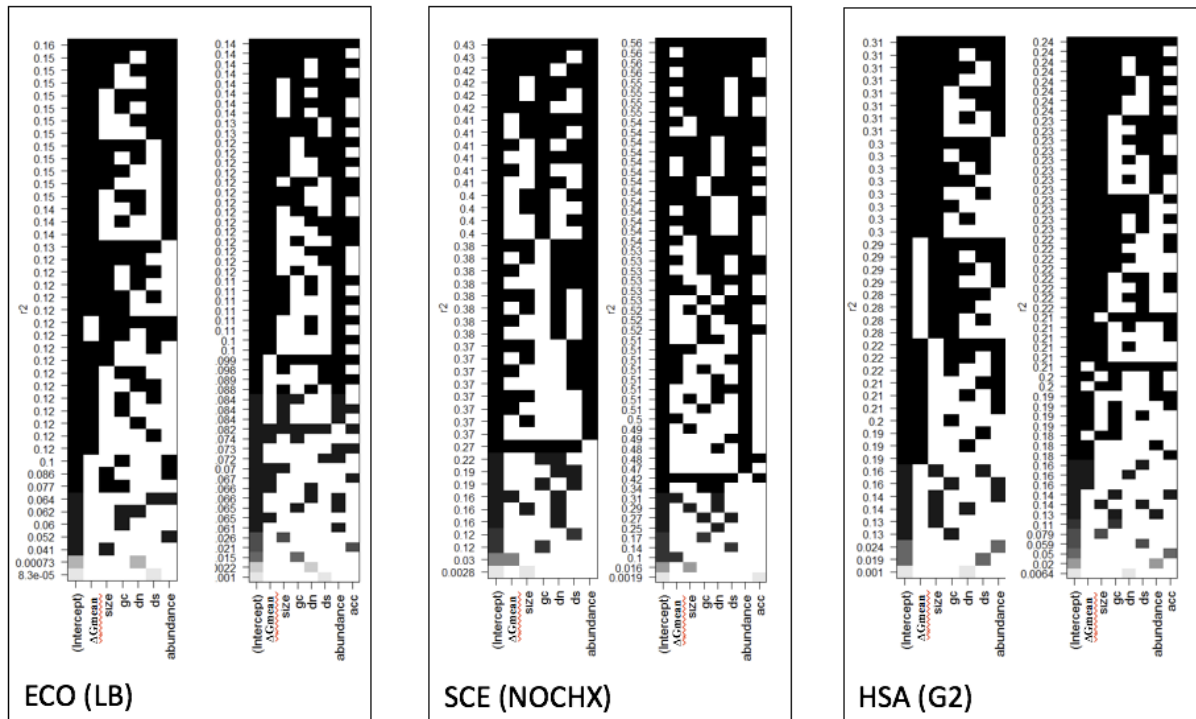

**Supplementary Figure 5:** Multiple regression models to predict translation efficiency. For ECO, SCE and HSA (respectively *E. coli*, *S. cerevisiae*, and *H. sapiens*), we selected respectively LB, NOCHX and G2 conditions so each species have only one condition presented. For each species, we predicted independently the translation efficiency from the transcriptome database using mRNA folding energy ( $\Delta G_{mean}$ ) GC content, protein size,  $dN$ ,  $dS$  and protein abundance and from the structural database using mRNA folding energy ( $\Delta G_{mean}$ ), GC content, protein size,  $dN$ ,  $dS$ , protein abundance and the protein solvent accessibility. Each line represent a model associated to its  $R^2$  and where the composition is noted by colored squared.

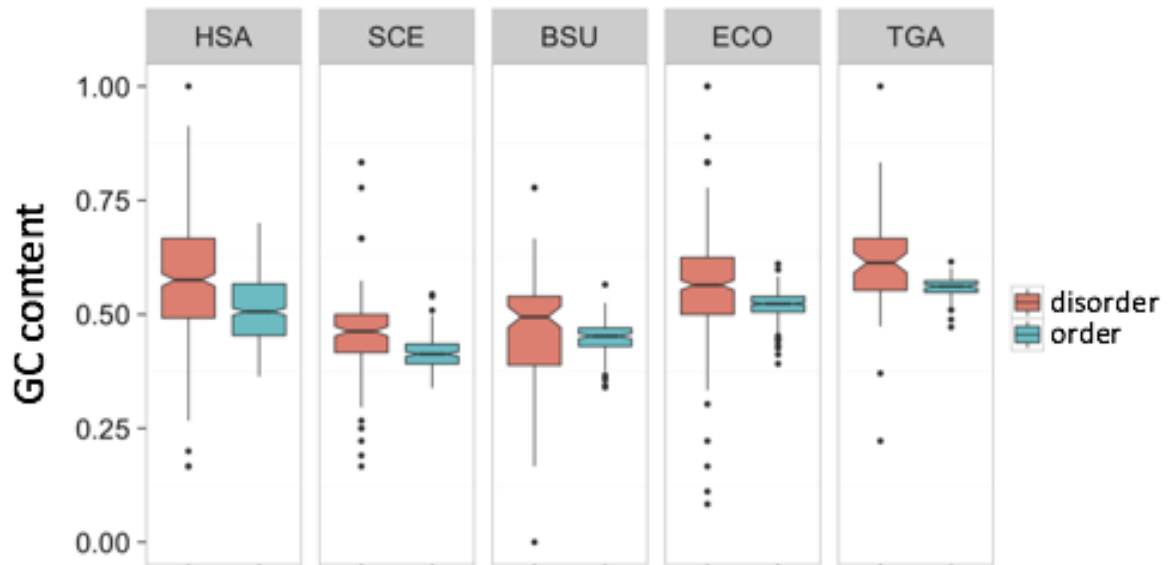

**Supplementary Figure 6:** Distribution of the mRNA GC-content encoded the disordered (red boxes) and ordered (blue boxes) parts of the protein. HSA, SCE, BSU, ECO, TGA correspond respectively to *H. sapiens*, *S. cerevisiae*, *B. subtilis*, *E. coli* and *T. gammatolerans*. We used the structural set.
